# Supplementary material
Source: bioRxiv or medRxiv preprint supplement (https://www.biorxiv.org/highwire/filestream/52843/field_highwire_adjunct_files/8/175505-7.pdf)

# Supplementary Figure 1

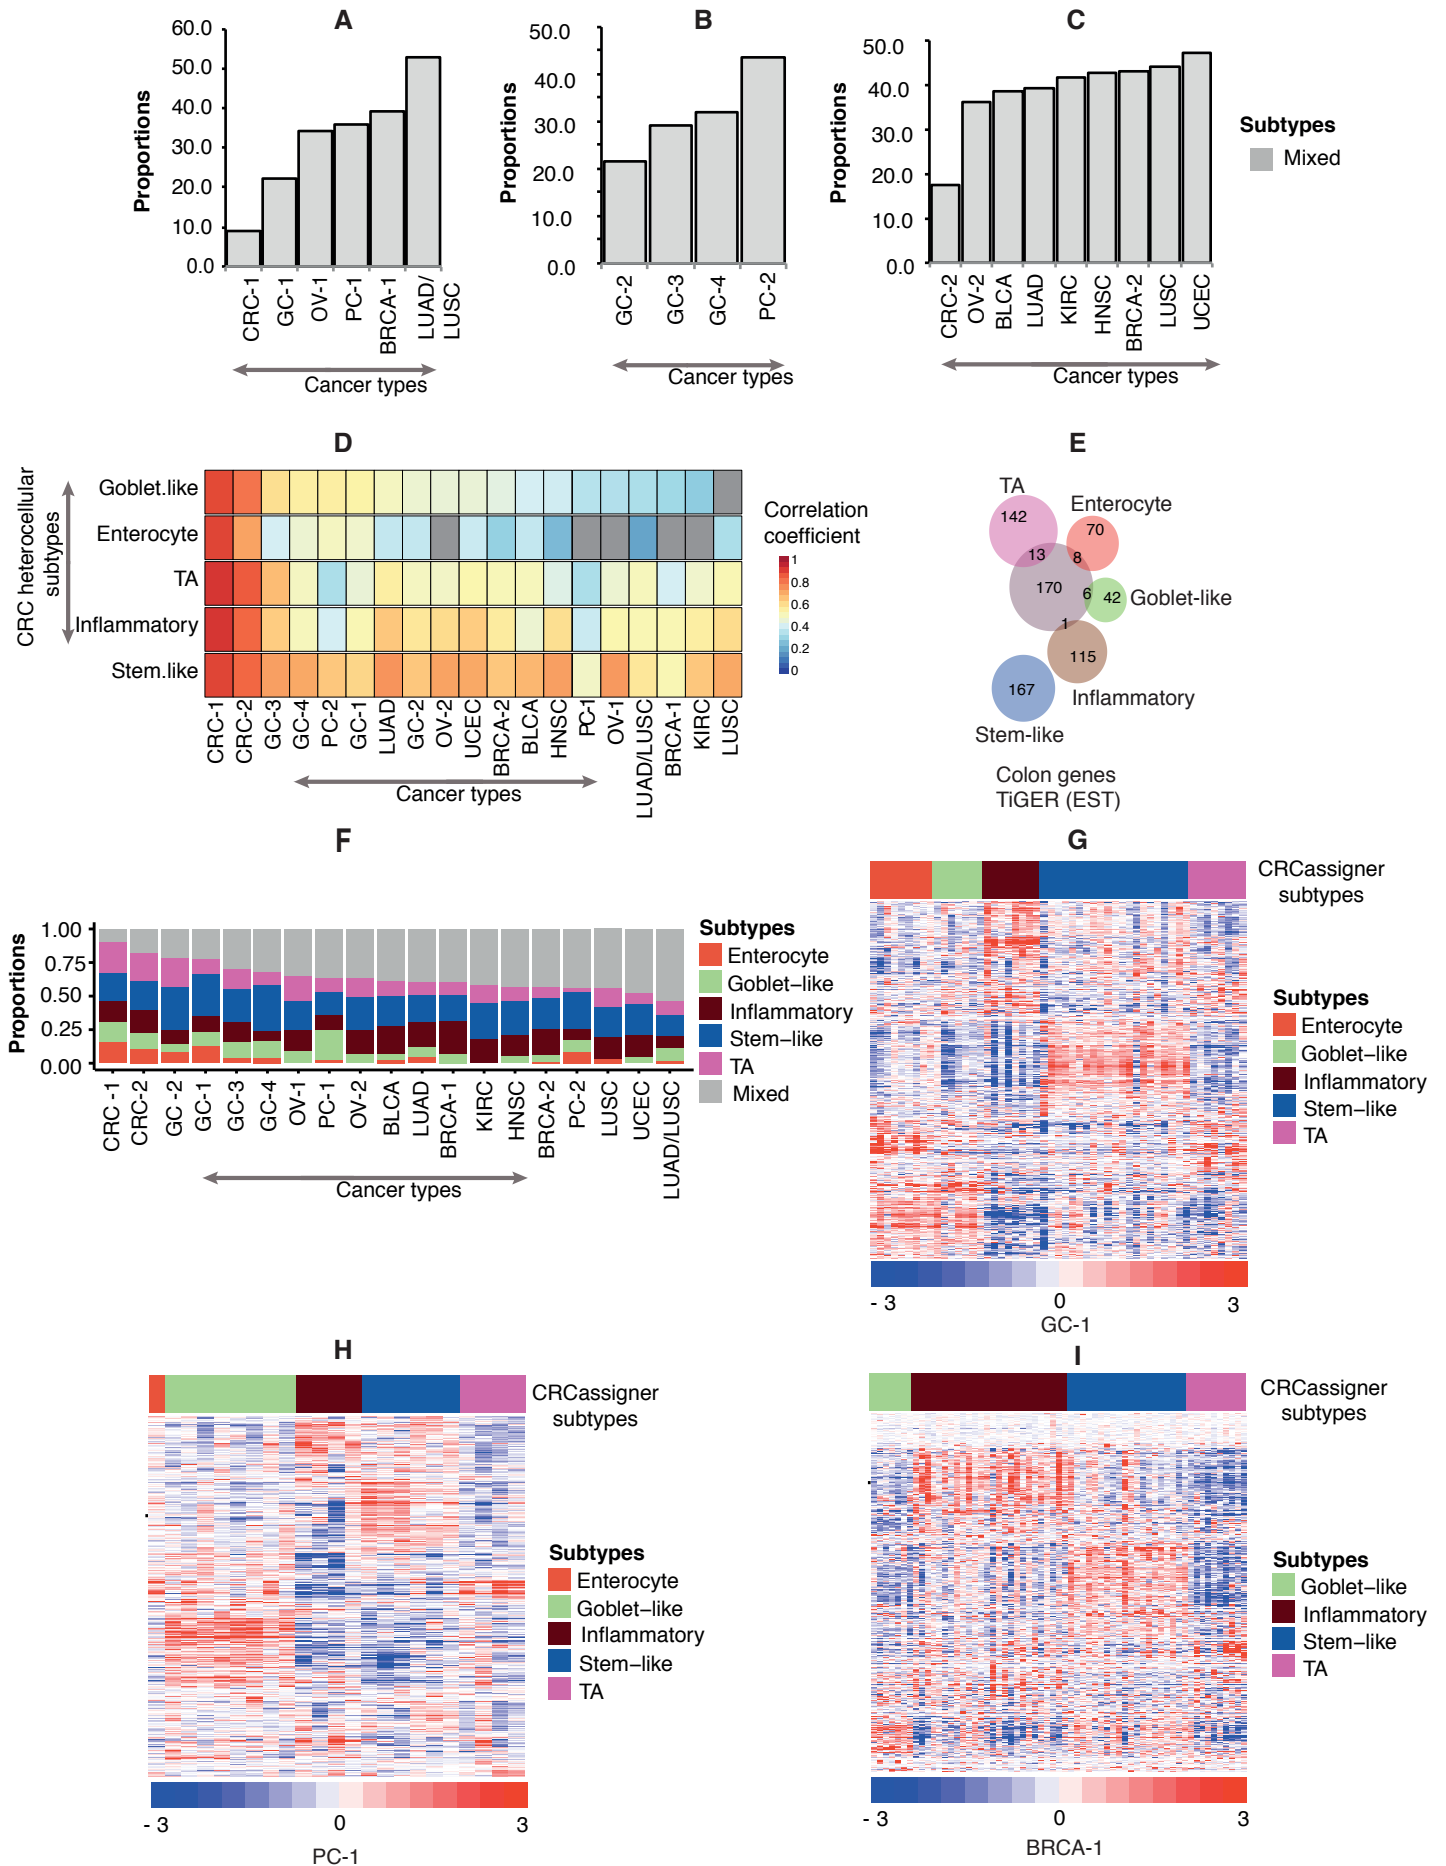

Supplement: Supplementary file [file 175505-7.pdf]
